# Supplementary material for: High dose vs. low dose oxytocin for labor augmentation: a systematic review and meta-analysis of randomized controlled trials
Source: publisher site journal article supplement (doi:10.1515/jpm-2020-0042), 2020-09-21
Supplement: Supplementary file 1 [file j_jpm-2020-0042_suppl_001.docx]

| Search | Search Query | Results | Reasons for exclusion of any paper |
| --- | --- | --- | --- |
| PUBMED | ((high dose OR high-dose) AND (low dose OR low-dose) AND (oxytocin OR pitocin) AND (labor OR delivery OR labour OR birth)) | 93 | - In vitro and animal studies. |
| COCHRANE | ((high dose OR high-dose) AND (low dose OR low-dose) AND (oxytocin OR pitocin) AND (labor OR delivery OR labour OR birth)) | 113 | - Non-randomized trials. |
| WOS | ((high dose OR high-dose) AND (low dose OR low-dose) AND (oxytocin OR pitocin) AND (labor OR delivery OR labour OR birth)) | 220 | - If the dose of oxytocin was not stated in one or both groups. |
| SCOUPS | (( high  AND dose  OR  high-dose )  AND  ( low  AND dose  OR  low-dose )  AND  ( oxytocin  OR  pitocin )  AND  ( labor  OR  delivery  OR  labour  OR  birth )) | 259 | - Studies containing data were unreliable for extraction and analysis.  - Reviews and letter to editors. |
